# Supplementary material for: Digital Exclusion and the Structural Barriers to Safety Strategies among Men and Non-Binary Sex Workers Who Solicit Clients Online
Source: MDPI journal article supplement (doi:10.3390/socsci11070318), 2022-07-21
Supplement: s1 [file s1]

Archive with 1 entries (1 files):
- socsci-1803318-supplementary.pdf
